# Supplementary material for: Nickel-catalyzed intermolecular codimerization of acrylates and alkynes
Source: Royal Society of Chemistry journal article supplement (doi:10.1039/c0cc04061d), 2011-01-01
Supplement: c0cc04061d.pdf [file c0cc04061d.pdf]

*Supporting Information for:*

**Nickel-Catalyzed Intermolecular Codimerization of Acrylates and Alkynes**

Hiroaki Horie, Ichiro Koyama, Takuya Kurahashi,\* and Seiji Matsubara\*

*Department of Material Chemistry, Graduate School of Engineering, Kyoto University,  
Kyoto-daigaku Katsura, Nishikyo-ku, Kyoto 615-8510, Japan*

**Contents**

|                                                         |            |
|---------------------------------------------------------|------------|
| <b>Instrumentation and Chemicals</b>                    | <b>S2</b>  |
| <b>Experimental Procedure and Characterization Data</b> | <b>S3</b>  |
| <b><sup>1</sup>H NMR and <sup>13</sup>C NMR Spectra</b> | <b>S10</b> |
| <b>ORTEP Drawing of A'</b>                              | <b>S22</b> |

## Instrumentation and Chemicals

All manipulations of oxygen- and moisture-sensitive materials were conducted in a dry box or with a standard Schlenk technique under a purified argon atmosphere. Nuclear magnetic resonance spectra were taken on Varian UNITY INOVA 500 ( $^1\text{H}$ , 500 MHz;  $^{13}\text{C}$ , 125.7 MHz) spectrometer using tetramethylsilane ( $^1\text{H}$ ) as an internal standard.  $^1\text{H}$  NMR data are reported as follows: chemical shift, multiplicity (s = singlet, d = doublet, t = triplet, q = quartet, quint = quintet, sext = sextet, sept = septet, br = broad, m = multiplet), coupling constants (Hz), integration, and identification. GC-MS analyses and High-resolution mass spectra were obtained with a JEOL JMS-700 spectrometer by electron ionization at 70 eV. Preparative recycling gel permeation chromatography (GPC) was performed with JAI LC-908 equipped with JAIGEL-1H and -2H columns (toluene as an eluent). Elemental analyses were carried out with a YANAKO MT2 CHN CORDER machine at Kyoto University Elemental Analysis Center. Infrared spectra (IR) spectra were determined on a SHIMADZU FTIR-8200PC spectrometer. In-situ IR spectra were obtained with Mettler Toledo ReactIR 45M equipped with AgX Fiber (9.5 mm). Melting points were determined using a YANAKO MP-500D. TLC analyses were performed by means of Merck Kieselgel 60 F<sub>254</sub> (0.25 mm) Plates. Visualization was accomplished with UV light (254 nm) and/or an aqueous alkaline  $\text{KMnO}_4$  solution followed by heating. Flash column chromatography was carried out using Kanto Chemical silica gel (spherical, 40–50  $\mu\text{m}$ ). Unless otherwise noted, commercially available reagents were used without purification. Toluene was purchased from Wako Pure Chemical Co. stored over slices of sodium. Bis(1,5-cyclooctadiene)nickel and ligands were purchased from Strem Chemicals, Inc.

## Experimental Procedure and Characterization Data

### Synthesis of *N*-phenyl-2-aminopyridine (3b).<sup>1</sup>

The reaction was performed in a 20 mL sealed tube equipped with a Teflon-coated magnetic stirrer tip. A mixture of 2-bromopyridine (1.58 g, 10 mmol) and aniline (1.83 mL, 20 mmol) was heated at 160 °C for 2 h. Saturated NaHCO<sub>3</sub> aq. was added slowly to the reaction mixture and the mixture was extracted with ethyl acetate (3 × 40 mL). The combined organic layers were washed with brine, dried over sodium sulfate and concentrated *in vacuo*. Aniline was removed by distillation under reduced pressure. The residue was recrystallized from hexane to give *N*-phenylaminopyridine (1.40 g, 82%). Another 2-aminopyridine derivatives were also synthesized in this method.

### Experimental Procedure for the Nickel-catalyzed Codimerization of Acrylates and Alkynes.

**General procedure.** The reaction was performed in a 5 mL sealed vessel equipped with a Teflon-coated magnetic stirrer tip. An acrylate (0.60 or 1.0 mmol) and an alkyne (0.50 mmol) were added to a solution of bis(1,5-dicyclooctadiene)nickel (14 mg, 0.050 mmol), tricyclohexylphosphine (14 mg, 0.050 mmol) and *N*-aryl-2-aminopyridine (0.10 mmol) in toluene (5 mL) in a dry box. The VIAL was taken outside the dry box and heated at 100 °C for 24 h. The reaction mixture was poured into 0.5N HCl aq. (30 mL) and the mixture was extracted with ethyl acetate (3 × 10 mL). The combined organic layers were washed with brine, dried over sodium sulfate and concentrated *in vacuo*. The residue was purified by flash silica gel column chromatography (hexane/AcOEt = 40/1) to give the corresponding conjugated diene.

### Methyl (2*E*,4*E*)-4-propyl-2,4-octadienoate (4aa).<sup>2</sup>

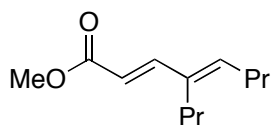

Colorless oil. TLC: *R*<sub>f</sub> 0.46 (hexane/AcOEt = 10/1). <sup>1</sup>H NMR (500 MHz, CDCl<sub>3</sub>): δ 7.25 (d, *J* = 15.5 Hz, 1H), 5.88 (t, *J* = 7.5 Hz, 1H), 5.80 (d, *J* = 15.5 Hz, 1H), 3.75 (s, 3H), 2.21 (t, *J* = 9.5 Hz, 2H), 2.16 (q, *J* = 7.5 Hz, 2H), 1.43 (m, 4H), 0.93 (t, *J* = 7.0 Hz, 3H), 0.92 (t, *J* = 7.0 Hz, 3H). <sup>13</sup>C NMR (125 MHz, CDCl<sub>3</sub>): δ 168.15, 149.28, 142.78, 137.35, 114.58, 51.42, 30.79, 28.57, 22.41, 21.90, 14.19, 13.88. IR (neat): 2960, 2873, 1722, 1625, 1464, 1434, 1378, 1307, 1265, 1191, 1168, 1043,

985, 858  $\text{cm}^{-1}$ . MS (EI):  $m/z$  (%): 196 ( $[\text{M}]^+$ , 40), 167 ( $[\text{M}-\text{Et}]^+$ , 36), 153 ( $[\text{M}-\text{Pr}]$ , 100), 137 ( $[\text{M}-\text{CO}_2\text{Me}]$ , 31). HRMS calcd for  $\text{C}_{12}\text{H}_{20}\text{O}_2$ : 196.1463. Found: 196.1462. Anal calcd for  $\text{C}_{12}\text{H}_{20}\text{O}_2$ : C, 73.43; H, 10.27. Found: C, 73.18; H, 10.51.

***tert*-Butyl (2*E*,4*E*)-4-propyl-2,4-octadienoate (4ba).**

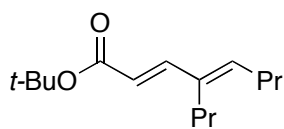

Colorless oil. TLC:  $R_f$  0.66 (hexane/AcOEt = 10/1).  $^1\text{H}$  NMR (500 MHz,  $\text{CDCl}_3$ ):  $\delta$  7.14 (d,  $J$  = 15.5 Hz, 1H), 5.83 (t,  $J$  = 7.0 Hz, 1H), 5.72 (d,  $J$  = 15.5 Hz, 1H), 2.20 (t,  $J$  = 8.0 Hz, 2H), 2.15 (q,  $J$  = 7.0 Hz, 2H), 1.49 (s, 9H), 1.43 (m, 4H), 0.92 (t,  $J$  = 7.5 Hz, 6H).  $^{13}\text{C}$  NMR (125 MHz,  $\text{CDCl}_3$ ):  $\delta$  167.13, 147.96, 141.77, 137.38, 116.94, 79.93, 30.74, 28.65, 28.21, 22.47, 21.94, 14.20, 13.87. IR (neat): 2961, 2872, 1709, 1624, 1456, 1368, 1308, 1285, 1256, 1152, 1086, 984, 858  $\text{cm}^{-1}$ . MS (EI):  $m/z$  (%): 238 ( $[\text{M}]^+$ , 27), 182 ( $[\text{M}-\text{CH}_2=\text{C}(\text{CH}_3)_2]^+$ , 38), 165 ( $[\text{M}-(\text{CH}_3)_3\text{CO}]^+$ , 35), 153 ( $[\text{M}-\text{CH}_2=\text{C}(\text{CH}_3)_2-\text{Et}]^+$ , 50), 139 ( $[\text{M}-\text{CH}_2=\text{C}(\text{CH}_3)_2-\text{Pr}]^+$ , 100). HRMS calcd for  $\text{C}_{15}\text{H}_{26}\text{O}_2$ : 238.1933. Found: 238.1935.

**Methyl (2*E*,4*E*)-4-pentyl-2,4-decadienoate (4ab).**

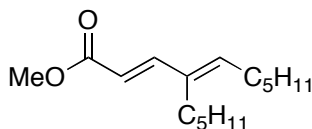

Colorless oil. TLC:  $R_f$  0.53 (hexane/AcOEt = 10/1).  $^1\text{H}$  NMR (500 MHz,  $\text{CDCl}_3$ ):  $\delta$  7.24 (d,  $J$  = 16.0 Hz, 1H), 5.86 (t,  $J$  = 7.5 Hz, 1H), 5.80 (d,  $J$  = 16.0 Hz, 1H), 3.75 (s, 3H), 2.21 (t,  $J$  = 7.5 Hz, 2H), 2.17 (q,  $J$  = 7.5 Hz, 2H), 1.46-1.25 (m, 12H), 0.89 (t,  $J$  = 7.0 Hz, 6H).  $^{13}\text{C}$  NMR (125 MHz,  $\text{CDCl}_3$ ):  $\delta$  168.14, 149.27, 142.74, 137.52, 114.58, 51.37, 32.02, 31.57, 28.86, 28.71, 28.44, 26.62, 22.52, 22.50, 13.99, 13.96. IR (neat): 2956, 2860, 1722, 1622, 1467, 1435, 1379, 1308, 1268, 1166, 1096, 1044, 985, 851  $\text{cm}^{-1}$ . MS (EI):  $m/z$  (%): 252 ( $[\text{M}]^+$ , 35), 195 ( $[\text{M}-\text{Bu}]^+$ , 36), 181 ( $[\text{M}-\text{C}_5\text{H}_{11}]^+$ , 100). HRMS calcd for  $\text{C}_{16}\text{H}_{28}\text{O}_2$ : 252.2089. Found: 252.2084.



**Methyl (2*E*,4*E*)-4-propylidene-2-octenoate and  
methyl (2*E*,4*E*)-4-ethyl-2,4-nonadienoate (1:1 mixture) (4ac).**

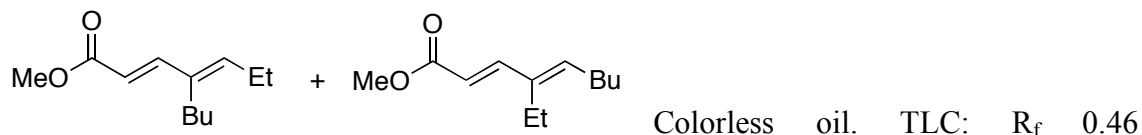

(hexane/AcOEt = 10/1).  $^1\text{H}$  NMR (500 MHz,  $\text{CDCl}_3$ ):  $\delta$  7.24 (d,  $J = 16.0$  Hz, 0.5H), 7.23 (d,  $J = 16.0$  Hz, 0.5H), 5.85 (t,  $J = 7.5$  Hz, 0.5H), 5.84 (t,  $J = 7.5$  Hz, 0.5H), 5.82 (d,  $J = 16.0$  Hz, 0.5H), 5.81 (d,  $J = 16.0$  Hz, 0.5H), 3.75 (s, 3H), 2.28-2.16 (m, 4H), 1.44-1.29 (m, 4H), 1.03 (t,  $J = 7.5$  Hz, 1.5H), 1.01 (t,  $J = 7.5$  Hz, 1.5H), 0.91 (t,  $J = 7.5$  Hz, 3H).  $^{13}\text{C}$  NMR (125 MHz,  $\text{CDCl}_3$ ):  $\delta$  168.14, 149.24, 148.79, 144.05, 142.22, 138.91, 137.01, 114.69, 114.50, 51.40, 31.35, 30.98, 28.25, 26.32, 22.89, 22.44, 22.02, 19.67, 13.94, 13.91, 13.67, 13.31. IR (neat): 2959, 2874, 1721, 1624, 1458, 1435, 1296, 1265, 1167, 1086, 984, 845  $\text{cm}^{-1}$ . MS (EI):  $m/z$  (%): 196 ( $[\text{M}]^+$ , 71), 167 ( $[\text{M}-\text{Et}]$ , 88), 139 ( $[\text{M}-\text{Bu}]$ , 100), 137 ( $[\text{M}-\text{CO}_2\text{Me}]$ , 50). HRMS calcd for  $\text{C}_{12}\text{H}_{20}\text{O}_2$ : 196.1463. Found: 196.1458.

**Methyl (2*E*,4*E*)-4-ethylidene-2-nonenoate and  
methyl (2*E*,4*E*)-4-methyl-2,4-decadienoate (5:1 mixture) (4ad).<sup>2</sup>**

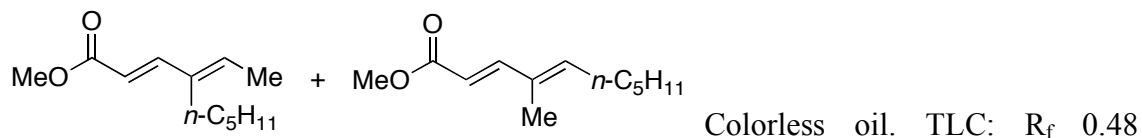

(hexane/AcOEt = 10/1).  $^1\text{H}$  NMR (500 MHz,  $\text{CDCl}_3$ ):  $\delta$  7.32 (d,  $J = 15.5$  Hz, 0.17H), 7.24 (d,  $J = 16.0$  Hz, 0.83H), 5.96 (q,  $J = 7.0$  Hz, 0.83H), 5.91 (t,  $J = 7.0$  Hz, 0.17H), 5.80 (d,  $J = 16.0$  Hz, 0.83H), 5.78 (d,  $J = 15.5$  Hz, 0.17H), 3.75 (s, 3H), 2.23 (t,  $J = 8.0$  Hz, 1.67H), 2.19 (q,  $J = 7.0$  Hz, 0.33H), 1.80 (d,  $J = 7.0$  Hz, 2.5H), 1.76 (s, 0.50H), 1.45-1.27 (m, 6H), 0.89 (t,  $J = 7.0$  Hz, 3H).  $^{13}\text{C}$  NMR (125 MHz,  $\text{CDCl}_3$ ):  $\delta$  168.17, 149.04, 138.63, 136.58, 114.43, 51.42, 31.95, 28.10, 26.21, 22.54, 14.48, 14.02. IR (neat): 2959, 2873, 1721, 1624, 1435, 1308, 1269, 1192, 1167, 984, 818  $\text{cm}^{-1}$ . MS (EI):  $m/z$  (%): 196 ( $[\text{M}]^+$ , 56), 181 ( $[\text{M}-\text{Me}]$ , 40), 139 ( $[\text{M}-\text{Bu}]^+$ , 87), 125 ( $[\text{M}-\text{C}_5\text{H}_{11}]^+$ , 100). HRMS calcd for  $\text{C}_{12}\text{H}_{20}\text{O}_2$ : 196.1463. Found: 196.1454.

**Methyl (2*E*,4*E*)-4-isopropyl-2,4-hexadienoate and methyl (2*E*,4*E*)-4,6-dimethyl-2,4-heptadienoate (10:1 mixture) (4ae).**

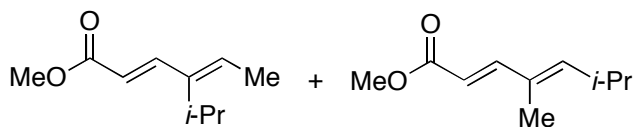

Colorless oil. TLC:  $R_f$  0.43

(hexane/AcOEt = 10/1).  $^1\text{H}$  NMR (500 MHz,  $\text{CDCl}_3$ ):  $\delta$  7.34 (d,  $J = 15.5$  Hz, 0.09H), 7.24 (d,  $J = 16.0$  Hz, 0.91H), 5.96 (d,  $J = 16.0$  Hz, 0.91H), 5.89 (q,  $J = 7.0$  Hz, 0.91H), 5.78 (d,  $J = 15.5$  Hz, 0.09H), 5.71 (d,  $J = 9.0$  Hz, 0.09H), 3.74 (s, 3H), 2.92 (sept,  $J = 7.0$  Hz, 0.91H), 2.68 (dsept,  $J = 9.0, 7.0$  Hz, 0.09H), 1.78 (d,  $J = 7.0$  Hz, 0.91H), 1.77 (s, 0.09H), 1.11 (d,  $J = 7.0$  Hz, 5.45H), 1.01 (d,  $J = 7.0$  Hz, 0.55H).  $^{13}\text{C}$  NMR (125 MHz,  $\text{CDCl}_3$ ):  $\delta$  167.91, 146.99, 143.05, 130.93, 115.98, 51.39, 27.23, 20.76, 14.10. IR (neat): 2963, 2874, 1722, 1621, 1435, 1300, 1270, 1173, 1045, 985, 865, 821  $\text{cm}^{-1}$ . MS (EI):  $m/z$  (%): 168 ( $[\text{M}]^+$ , 50), 153 ( $[\text{M}-\text{Me}]^+$ , 100), 109 ( $[\text{M}-\text{CO}_2\text{Me}]^+$ , 72). HRMS calcd for  $\text{C}_{10}\text{H}_{16}\text{O}_2$ : 168.1150. Found: 168.1158.

**Methyl (2*E*,4*E*)-4-benzylidene-2-heptenoate (4af).<sup>2</sup>**

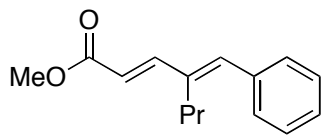

Colorless oil. TLC:  $R_f$  0.35 (hexane/AcOEt = 10/1).  $^1\text{H}$  NMR

(500 MHz,  $\text{CDCl}_3$ ):  $\delta$  7.42 (d,  $J = 16.0$  Hz, 1H), 7.38 (t,  $J = 7.5$  Hz, 2H), 7.31 (m, 3H), 6.81 (s, 1H), 5.99 (d,  $J = 16.0$  Hz, 1H), 3.79 (s, 3H), 2.45 (t,  $J = 8.0$  Hz, 2H), 1.56 (m, 2H), 0.99 (t,  $J = 7.0$  Hz, 3H).  $^{13}\text{C}$  NMR (125 MHz,  $\text{CDCl}_3$ ):  $\delta$  167.82, 149.44, 138.99, 138.83, 136.63, 129.04, 128.45, 127.78, 116.74, 51.54, 29.36, 22.18, 14.28. IR (neat): 2957, 2873, 1717, 1619, 1435, 1309, 1266, 1168, 1084, 1031, 983, 851, 696  $\text{cm}^{-1}$ . MS (EI):  $m/z$  (%): 230 ( $[\text{M}]^+$ , 26), 201 ( $[\text{M}-\text{Et}]^+$ , 28), 171 ( $[\text{M}-\text{CO}_2\text{Me}]^+$ , 66), 141 (76), 129 ( $[\text{M}-\text{PhCH}_2]^+$ , 100). HRMS calcd for  $\text{C}_{15}\text{H}_{18}\text{O}_2$ : 230.1307. Found: 230.1301.

**Methyl (2*E*,4*E*)-4-(4-methoxybenzylidene)-2-nonenoate (4ag).**

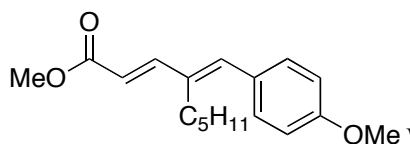

White solid, mp. 35-37  $^{\circ}\text{C}$  (hexane-AcOEt). TLC:  $R_f$  0.30 (hexane/AcOEt = 10/1).  $^1\text{H}$  NMR (500 MHz,  $\text{CDCl}_3$ ):  $\delta$  7.41 (d,  $J = 15.5$  Hz, 1H), 7.29 (d,  $J = 9.0$  Hz, 2H), 6.91 (d,  $J = 9.0$  Hz, 2H), 6.73 (s, 1H), 5.94 (d,  $J = 15.5$  Hz,

1H), 3.83 (s, 3H), 3.78 (s, 3H), 2.46 (t,  $J = 7.5$  Hz, 2H), 1.56 (m, 2H), 1.37 (m, 4H), 0.92 (t,  $J = 7.0$  Hz, 3H).  $^{13}\text{C}$  NMR (125 MHz,  $\text{CDCl}_3$ ):  $\delta$  167.98, 159.34, 149.98, 138.60, 137.44, 130.65, 129.24, 115.67, 113.98, 55.29, 51.47, 32.17, 28.38, 27.31, 22.44, 14.04. IR (neat): 2954, 2871, 1717, 1618, 1601, 1509, 1435, 1306, 1255, 1165, 1035, 982, 851, 824, 730  $\text{cm}^{-1}$ . MS (EI):  $m/z$  (%): 288 ( $[\text{M}]^+$ , 68), 229 ( $[\text{M}-\text{CO}_2\text{Me}]^+$ , 65), 171 (73), 159 (62), 121 ( $[\text{MeO}-\text{C}_6\text{H}_4-\text{CH}_2]^+$ , 100). HRMS calcd for  $\text{C}_{18}\text{H}_{24}\text{O}_3$ : 288.1725. Found: 288.1728. Anal calcd for  $\text{C}_{18}\text{H}_{24}\text{O}_3$ : C, 74.97; H, 8.39. Found: C, 74.98; H, 8.68.

**Methyl (2E,4E)-4-(4-fluorobenzylidene)-2-nonenoate (4ah).**

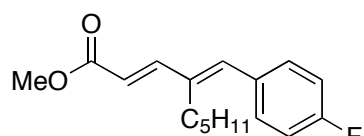

Colorless oil. TLC:  $R_f$  0.36 (hexane/AcOEt = 10/1).  $^1\text{H}$  NMR (500 MHz,  $\text{CDCl}_3$ ):  $\delta$  7.39 (d,  $J = 16.0$  Hz, 1H), 7.29 (dd,  $J_{\text{HH}} = 9.0$  Hz,  $J_{\text{HF}} = 5.0$  Hz, 2H), 7.07 (dd,  $J_{\text{HH}} = 9.0$  Hz,  $J_{\text{HF}} = 9.0$  Hz, 2H), 6.75 (s, 1H), 5.98 (d,  $J = 16.0$  Hz, 1H), 3.79 (s, 3H), 2.43 (t,  $J = 8.0$  Hz, 2H), 1.53 (m, 2H), 1.34 (m, 4H), 0.90 (t,  $J = 7.0$  Hz, 3H).  $^{13}\text{C}$  NMR (125 MHz,  $\text{CDCl}_3$ ):  $\delta$  167.76, 162.20 (d,  $J_{\text{CF}} = 247$  Hz), 149.18, 139.04, 137.36, 132.75 (d,  $J_{\text{CF}} = 3.4$  Hz), 130.75 (d,  $J_{\text{CF}} = 7.8$  Hz), 116.89, 115.49 (d,  $J_{\text{CF}} = 21.5$  Hz), 51.55, 32.08, 28.48, 27.23, 22.37, 13.98. IR(neat): 2954, 2872, 1706, 1622, 1598, 1506, 1435, 1312, 1269, 1235, 1167, 1091, 981, 855, 826, 728  $\text{cm}^{-1}$ . MS (EI):  $m/z$  (%): 276 ( $[\text{M}]^+$ , 56), 219 ( $[\text{M}-\text{Bu}]^+$ , 85), 159 (100), 109 ( $[\text{F}-\text{C}_6\text{H}_4-\text{CH}_2]^+$ , 60). HRMS calcd for  $\text{C}_{17}\text{H}_{21}\text{FO}_2$ : 276.1526. Found: 276.1521. Anal calcd for  $\text{C}_{17}\text{H}_{21}\text{FO}_2$ : C, 73.89; H, 7.66. Found: C, 73.63; H, 7.66.

**Methyl (2E,4E)-4-cyclopropyl-5-phenyl-2,4-pentadienoate (4ai).**

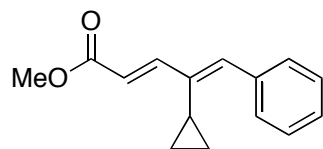

White powder, mp. 62-65  $^{\circ}\text{C}$  ( $\text{Et}_2\text{O}$ ). TLC:  $R_f$  0.41 (hexane/AcOEt = 10/1).  $^1\text{H}$  NMR (500 MHz,  $\text{CDCl}_3$ ):  $\delta$  7.52 (d,  $J = 7.5$  Hz, 2H), 7.41 (d,  $J = 15.5$  Hz, 1H), 7.35 (t,  $J = 7.5$  Hz, 2H), 7.28 (t,  $J = 7.5$  Hz, 1H), 6.84 (s, 1H), 6.36 (d,  $J = 15.5$  Hz, 1H), 3.79 (s, 3H), 1.61 (m, 1H), 0.89 (m, 2H), 0.25 (m, 2H).  $^{13}\text{C}$  NMR (125 MHz,  $\text{CDCl}_3$ ):  $\delta$  167.92, 149.56, 140.07, 138.53, 136.11, 130.06, 127.94, 127.89, 117.99, 51.47, 9.71, 8.89. IR (KBr): 3026, 2988, 2949, 1709, 1615, 1447, 1429, 1309, 1292, 1195, 1162, 1006, 857, 694  $\text{cm}^{-1}$ . MS (EI):  $m/z$  (%): 228 ( $[\text{M}]^+$ , 71), 169

([M-CO<sub>2</sub>Me]<sup>+</sup>, 100), 168 (62). HRMS calcd for C<sub>15</sub>H<sub>16</sub>O<sub>2</sub>: 228.1150. Found: 228.1156. Anal calcd for C<sub>15</sub>H<sub>16</sub>O<sub>2</sub>: C, 78.92; H, 7.06. Found: C, 78.85; H, 7.20.

### Experimental Procedure for the Nickel-catalyzed Reaction of Acrylamides and Alkynes.

**General procedure.** The reaction was performed in a 5 mL sealed vessel equipped with a Teflon-coated magnetic stirrer tip. An acrylamide (0.50 mmol) and an alkyne (0.60 mmol) were added to a solution of bis(1,5-dicyclooctadiene)nickel (14 mg, 0.050 mmol) and tricyclohexylphosphine (14 mg, 0.050 mmol) in 1,4-dioxane (5 mL) in a dry box. The VIAL was taken outside the dry box and heated at 80 °C for 24 h. The resulting reaction mixture was cooled to ambient temperature and filtered through a silica gel pad, concentrated *in vacuo*. The residue was purified by flash silica gel column chromatography (hexane/AcOEt = 10/1) to give the corresponding conjugated diene.

#### (2*E*,4*E*)-*N*-Phenyl-4-propyl-2,4-octadienamide (7aa).

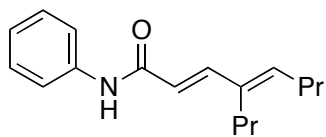

White powder, mp. 107-108 °C (CH<sub>2</sub>Cl<sub>2</sub>). TLC: R<sub>f</sub> 0.39 (hexane/AcOEt = 5/1). <sup>1</sup>H NMR (500 MHz, CDCl<sub>3</sub>): δ 7.59 (d, *J* = 7.5 Hz, 2H), 7.46 (br, 1H), 7.32 (t, *J* = 7.5 Hz, 2H), 7.30 (d, *J* = 15.5 Hz, 1H), 7.09 (d, *J* = 7.5 Hz, 1H), 5.92 (d, *J* = 15.5 Hz, 1H), 5.87 (t, *J* = 7.5 Hz, 1H), 2.23 (t, *J* = 8.0 Hz, 2H), 2.16 (q, *J* = 7.5 Hz, 2H), 1.44 (m, 4H), 0.93 (t, *J* = 7.5 Hz, 6H). <sup>13</sup>C NMR (125 MHz, CDCl<sub>3</sub>): δ 164.89, 146.64, 142.09, 138.29, 137.04, 128.96, 124.07, 119.82, 117.57, 30.79, 28.80, 22.44, 21.96, 14.20, 13.87. IR (KBr): 3254, 2959, 2870, 1655, 1599, 1541, 1499, 1441, 1339, 1246, 1182, 1087, 901, 866, 754, 690 cm<sup>-1</sup>. MS (EI): *m/z* (%): 257 ([M]<sup>+</sup>, 84), 165 ([M-PhNH]<sup>+</sup>, 100). HRMS calcd for C<sub>17</sub>H<sub>23</sub>NO: 257.1780. Found: 257.1786. Anal calcd for C<sub>17</sub>H<sub>23</sub>NO: C, 79.33; H, 9.01; N, 5.44. Found: C, 79.42; H, 9.13; N, 5.43.

**(2E,4Z,6E)-N-Methyl-N-phenyl-4,5,6-tripropyldeca-2,4,6-trienamide (8ba).**

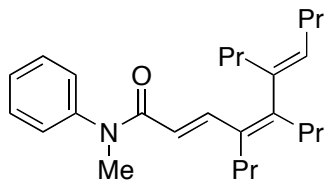

Pale yellow oil.  $R_f = 0.45$  (hexane/AcOEt = 10/1).  $^1\text{H}$  NMR (500 MHz,  $\text{CDCl}_3$ ):  $\delta$  7.70 (d,  $J = 15.5$  Hz, 1H), 7.39 (t,  $J = 7.5$  Hz, 2H), 7.30 (t,  $J = 7.5$  Hz, 1H), 7.19 (d,  $J = 7.5$  Hz, 2H), 5.66 (d,  $J = 15.5$  Hz, 1H), 5.03 (t,  $J = 7.5$  Hz, 1H), 3.35 (s, 3H), 2.12 (m, 6H), 1.94 (t,  $J = 7.5$  Hz, 2H), 1.46 (m, 2H), 1.38 (m, 4H), 1.18 (m, 2H), 0.94 (t,  $J = 7.5$  Hz, 3H), 0.90 (t,  $J = 7.5$  Hz, 3H), 0.85 (t,  $J = 7.5$  Hz, 3H), 0.67 (t,  $J = 7.5$  Hz, 3H).  $^{13}\text{C}$  NMR (125 MHz,  $\text{CDCl}_3$ ):  $\delta$  167.37, 152.32, 144.30, 142.75, 138.69, 132.63, 131.78, 129.29, 127.39, 127.07, 115.86, 37.12, 33.26, 31.87, 30.16, 30.14, 23.03, 22.20, 21.81, 21.37, 14.52, 14.13, 14.06, 13.99. IR (neat): 2958, 2871, 1657, 1596, 1496, 1362, 1289, 1122, 990, 898, 857, 772, 700  $\text{cm}^{-1}$ . MS (EI):  $m/z$  (%): 381 ( $[\text{M}]^+$ , 44), 275 ( $[\text{M}-\text{NMePh}]^+$ , 100), 247 ( $[\text{M}-\text{C}(\text{O})\text{NMePh}]^+$ , 75), 205 (82). HRMS calcd for  $\text{C}_{26}\text{H}_{39}\text{NO}$ : 381.3032. Found: 381.3031.

[References]

1. T. Hisano, T. Matsuoka, K. Tsutsumi, K. Muraoka, M. Ichikawa, *Chem. Pharm. Bull.* 1981, **29**, 3706.
2. N. M. Neisius, B. Plietker, *Angew. Chem., Int. Ed.* 2009, **48**, 5752.

# $^1\text{H}$ NMR and $^{13}\text{C}$ NMR Spectra

4aa

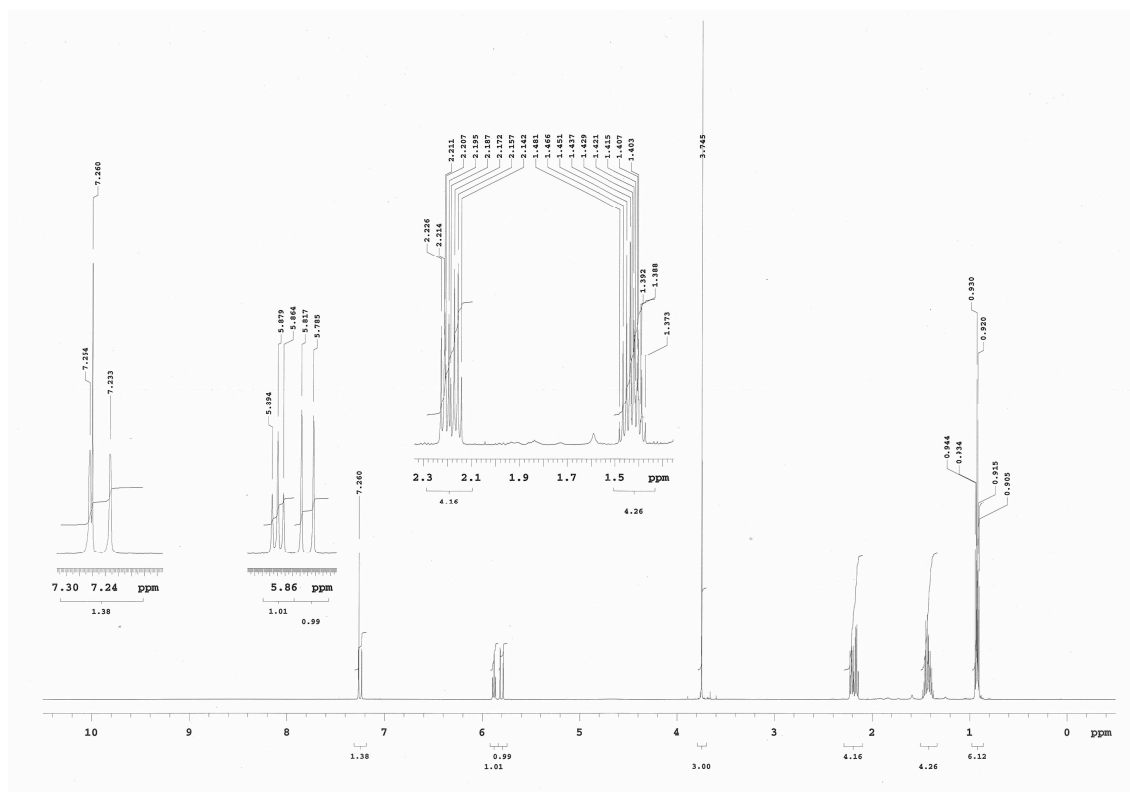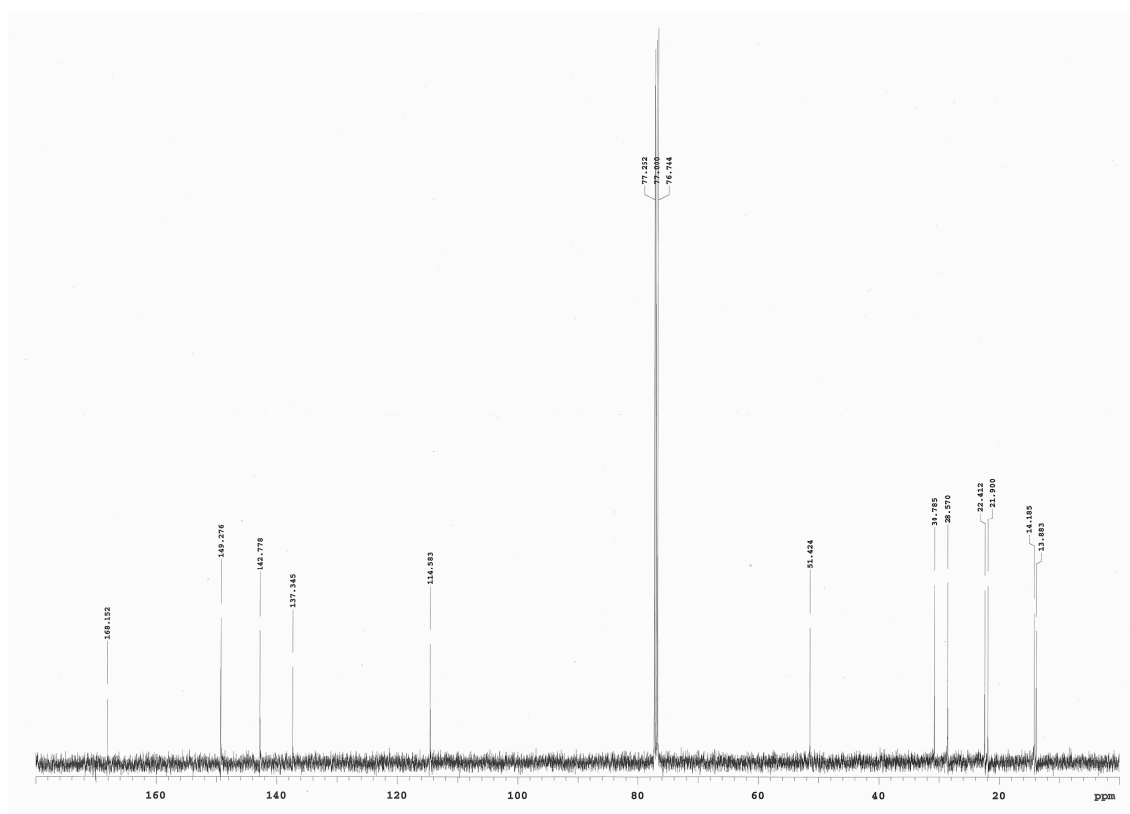

4ba

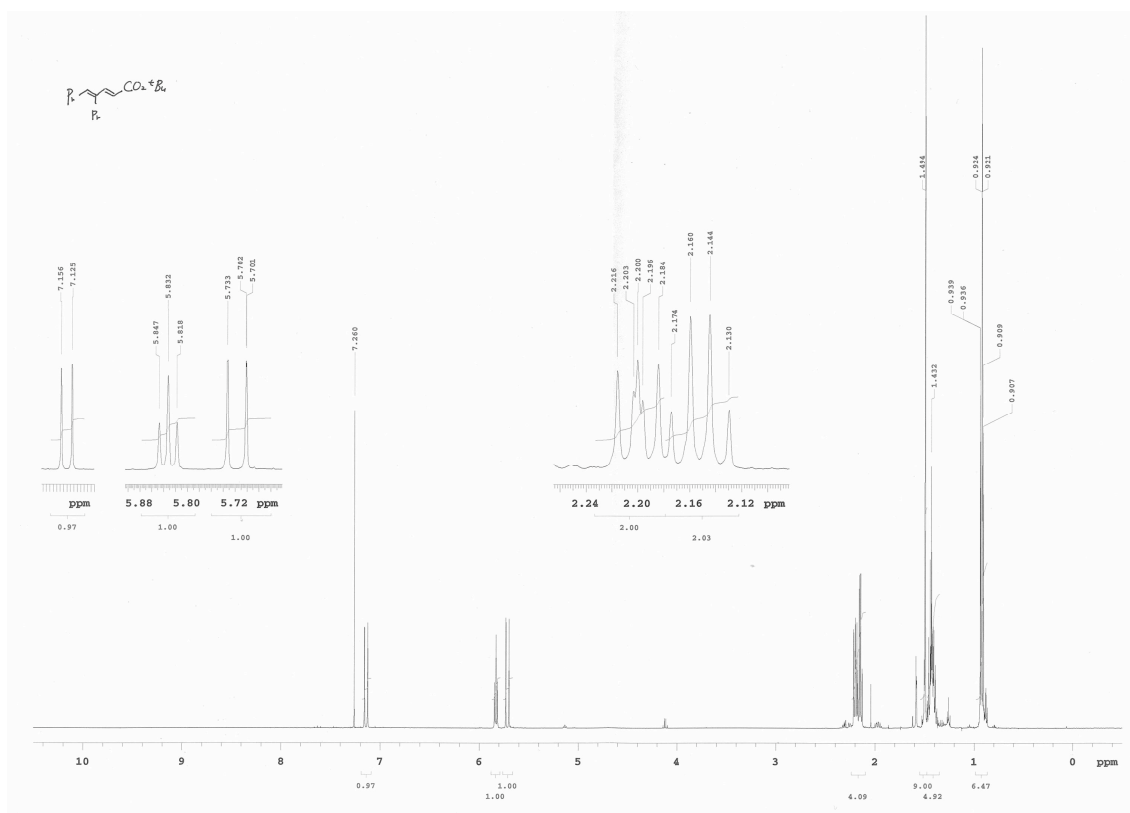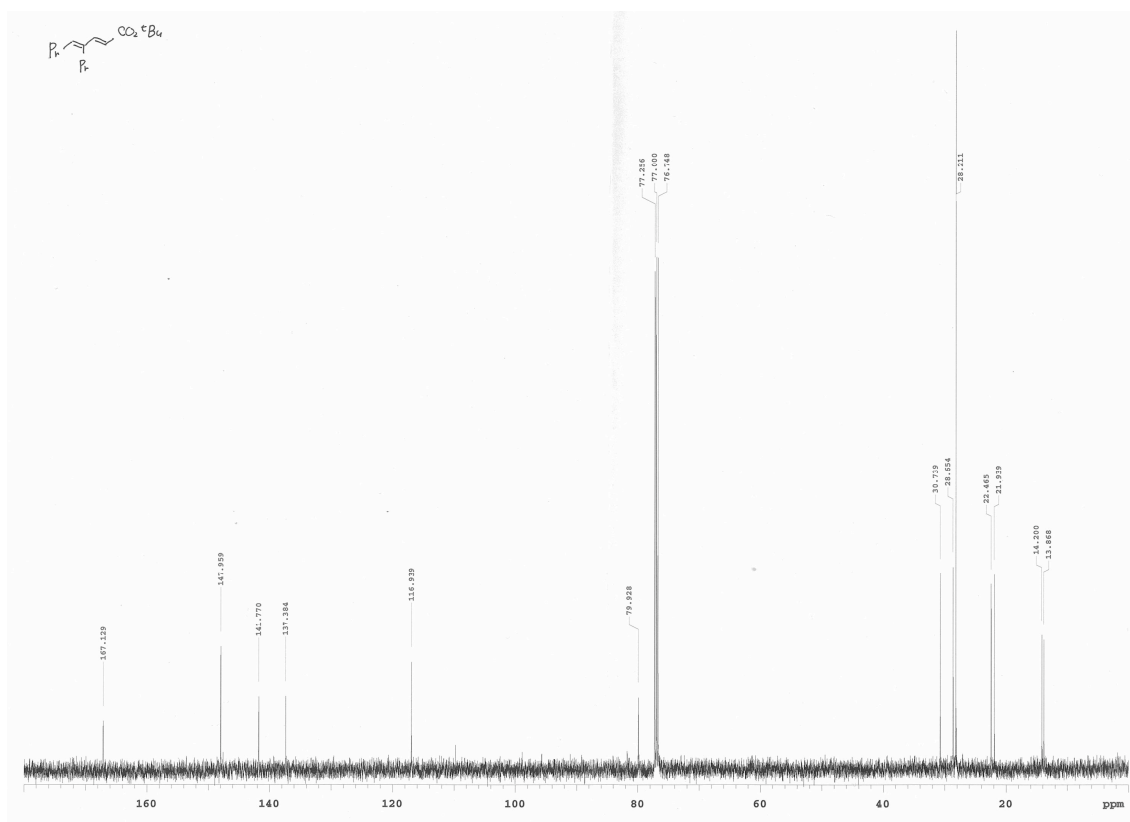

4ab

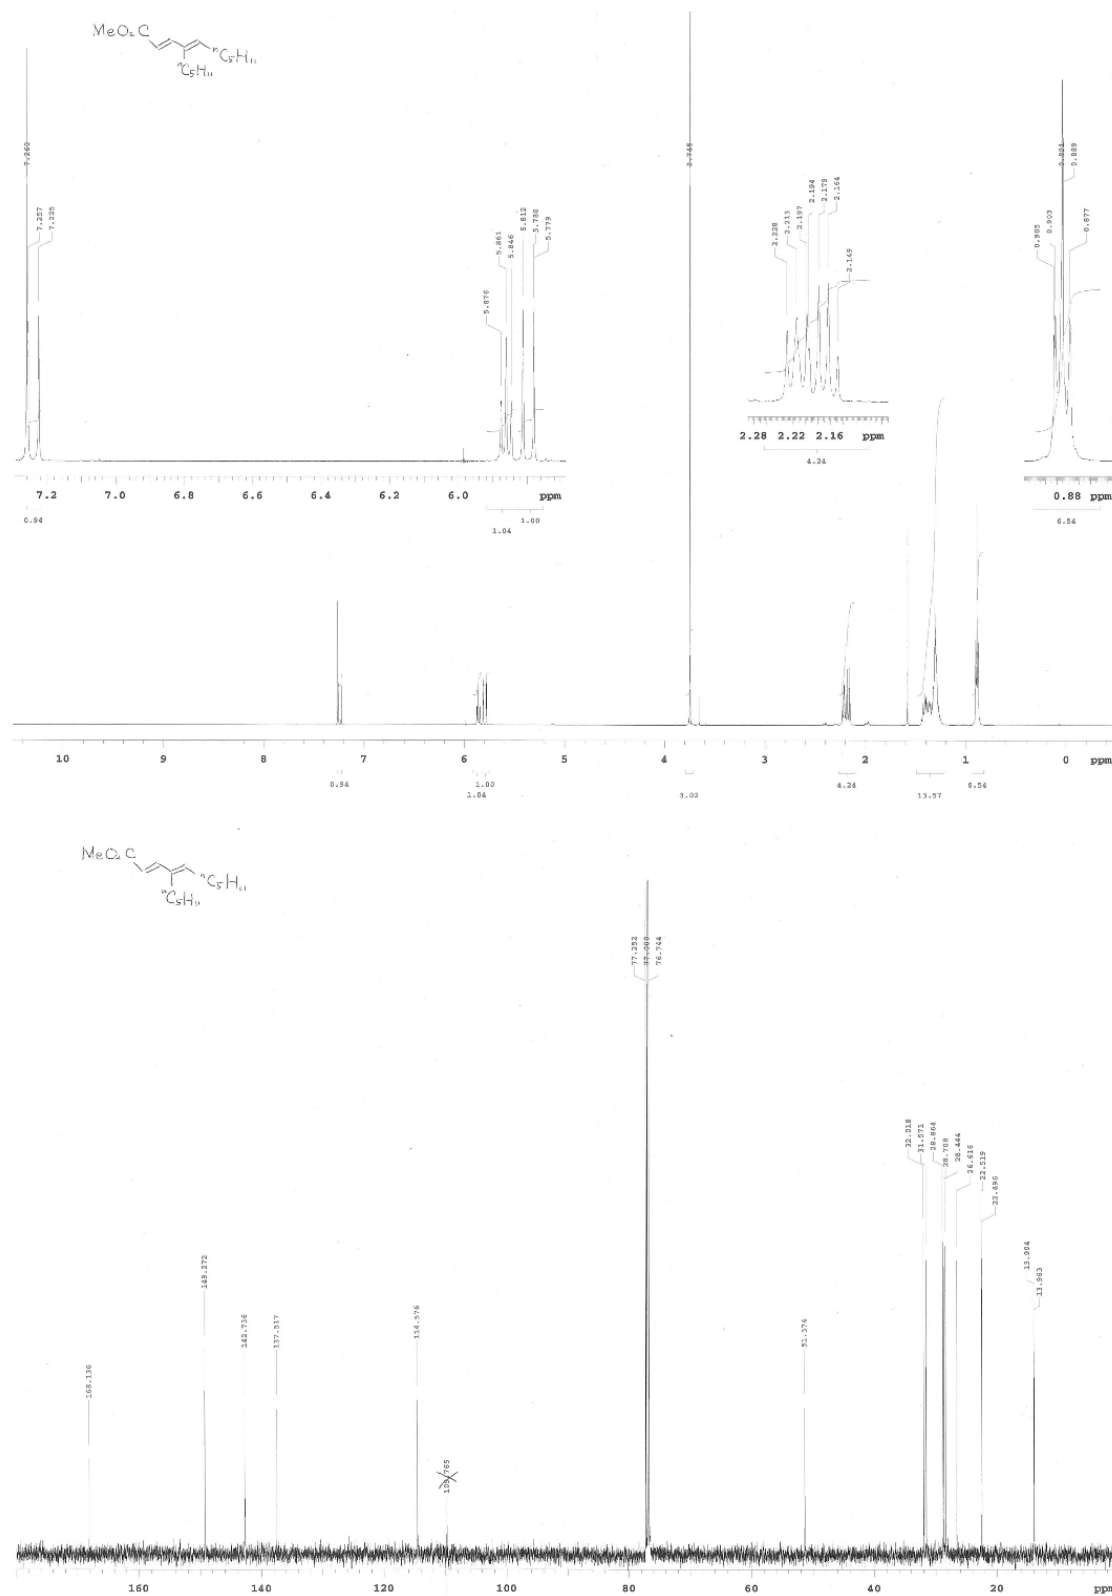



4ac

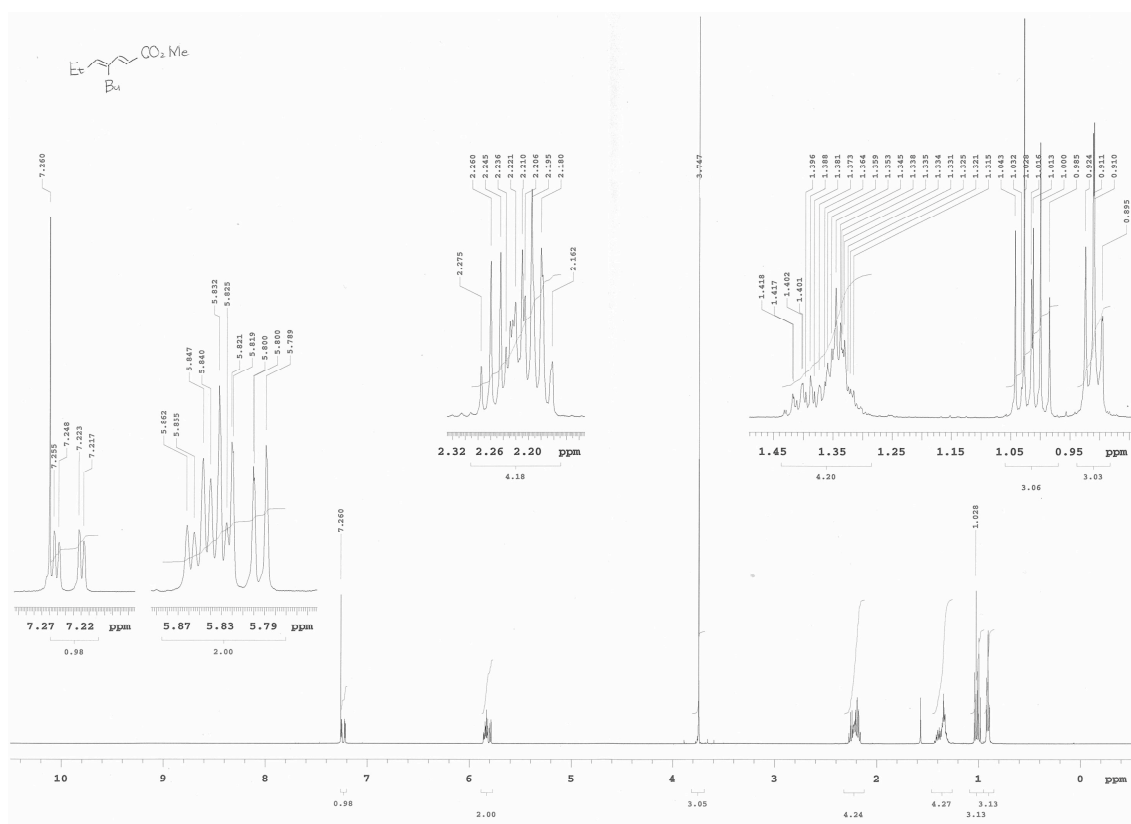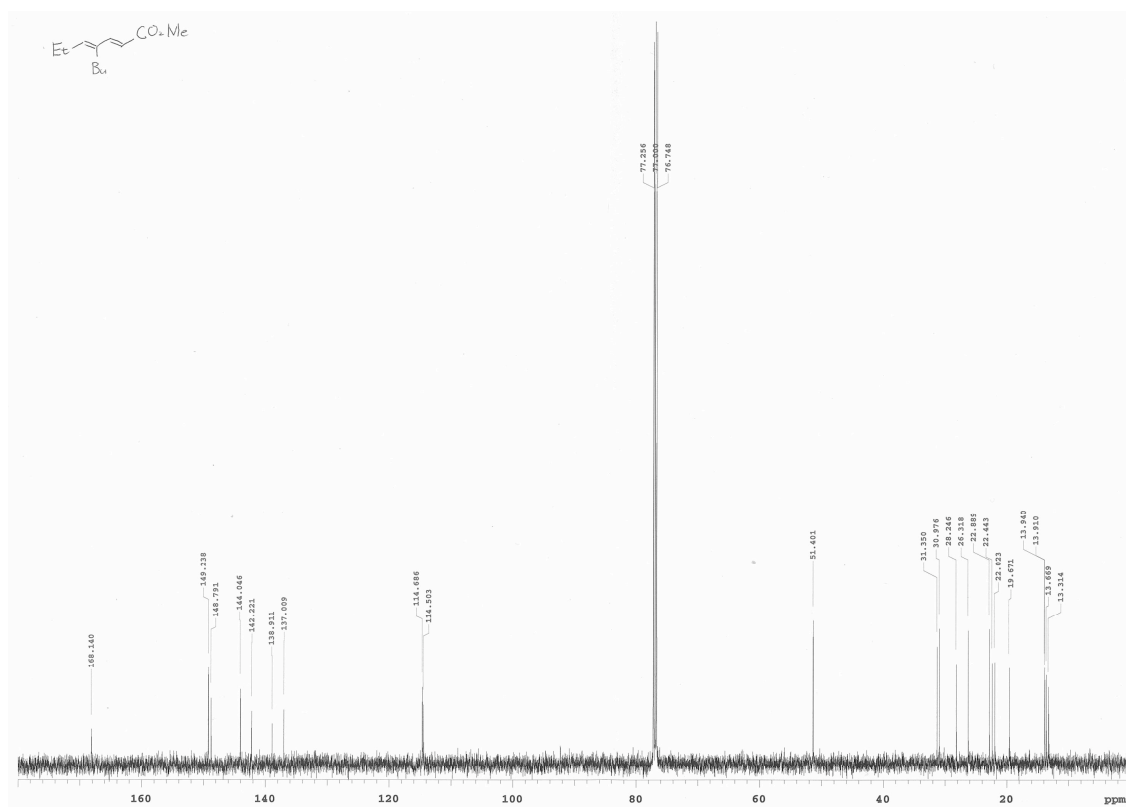

4ad

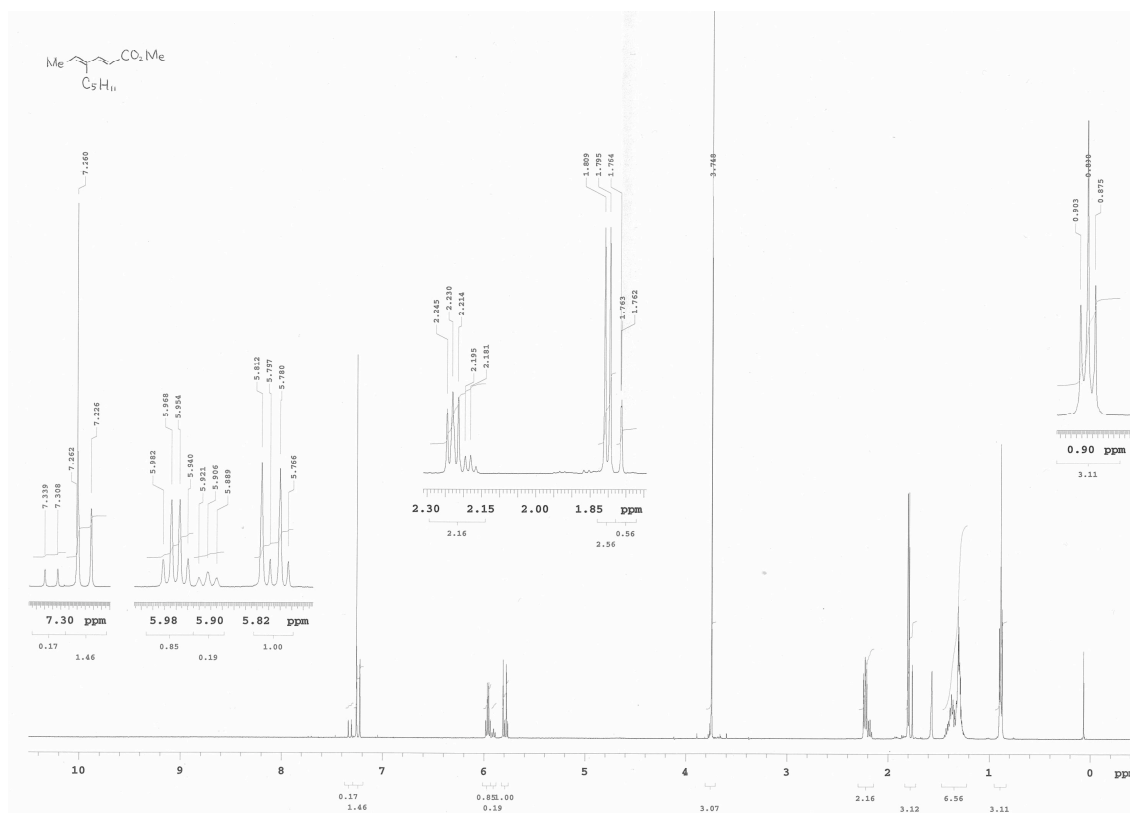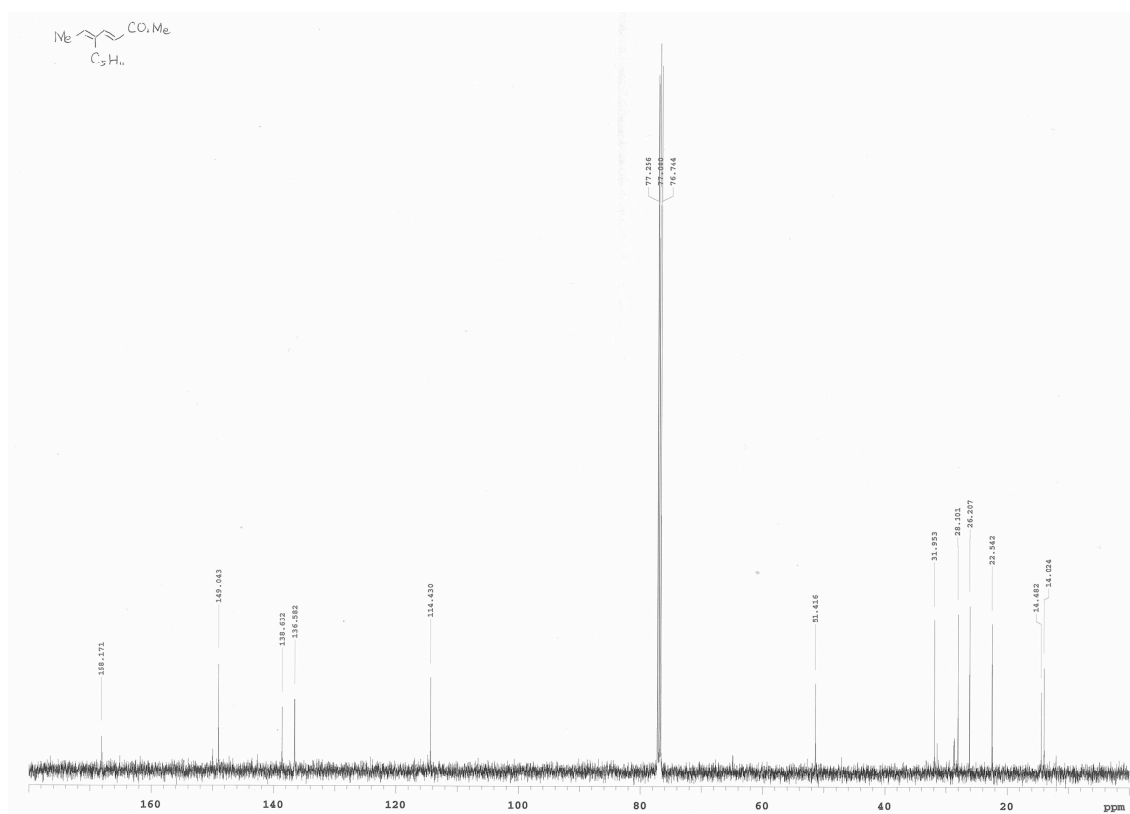

4ae

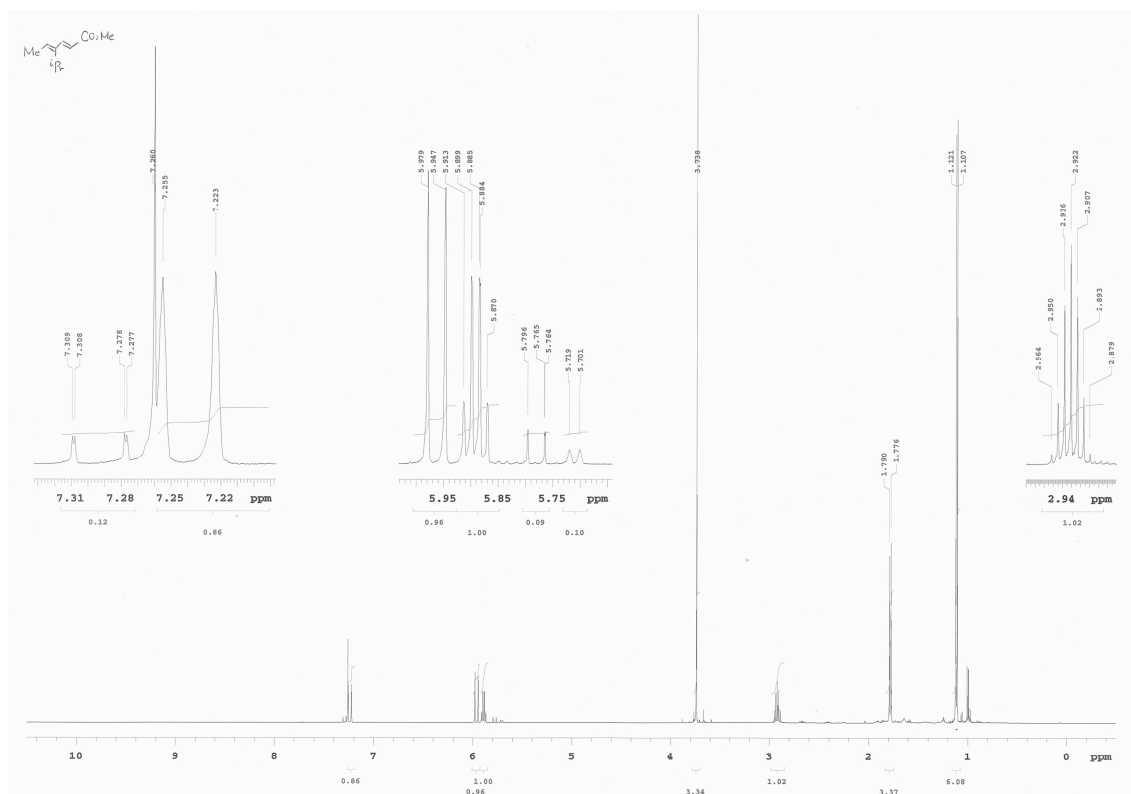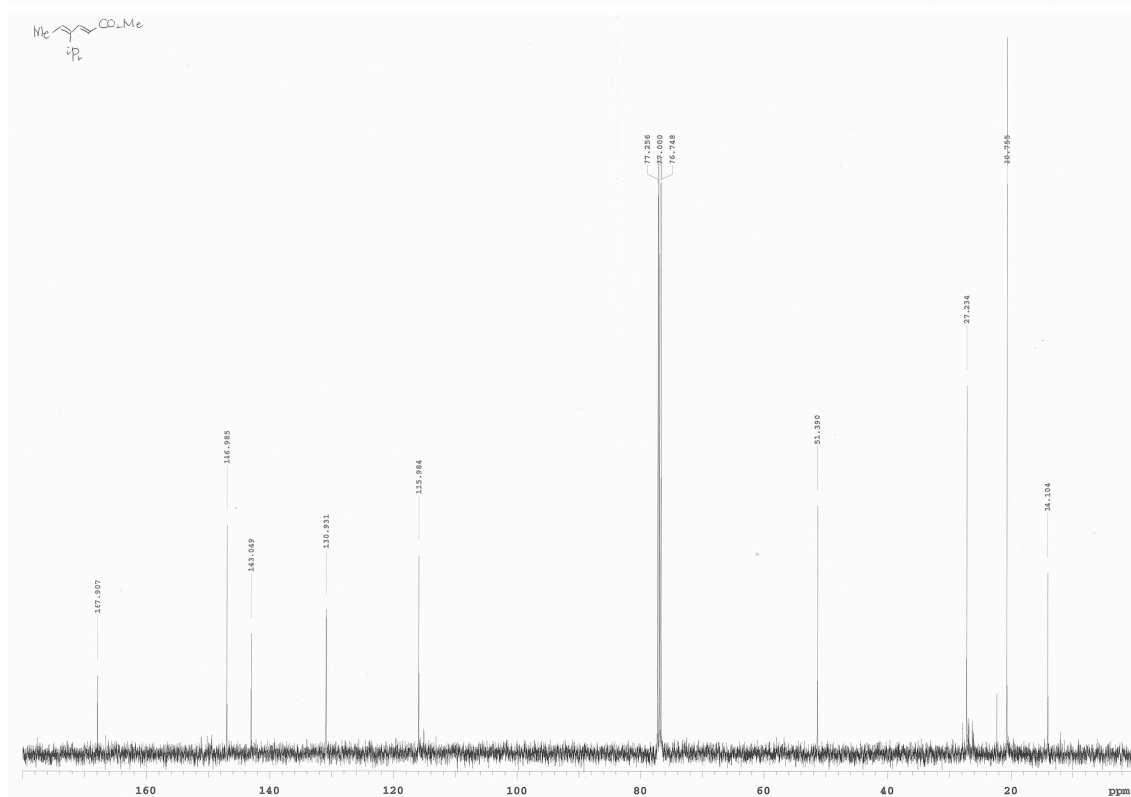

4af

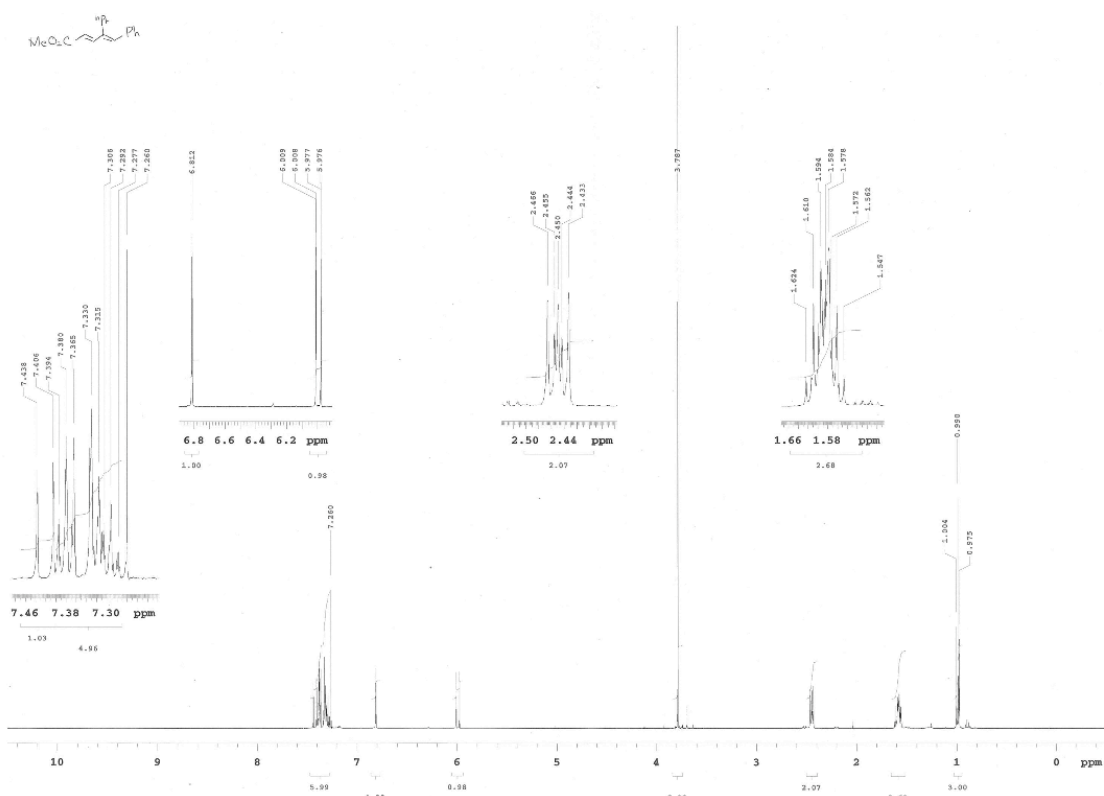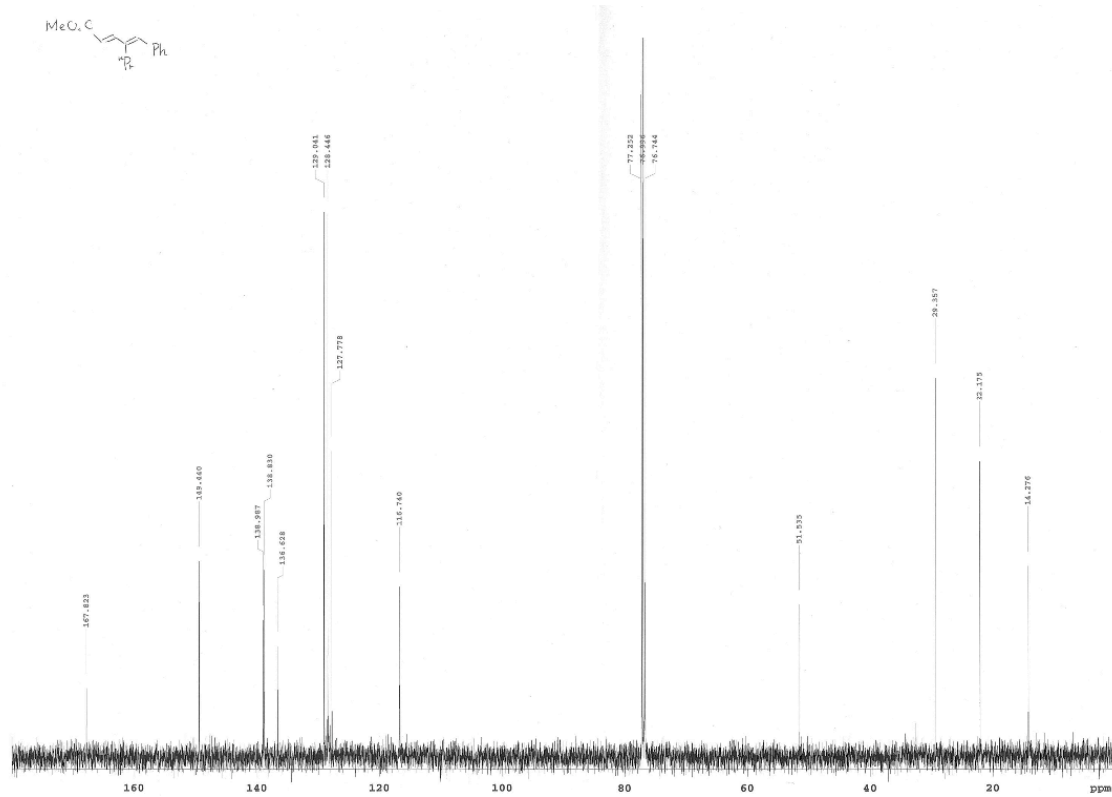

4ag

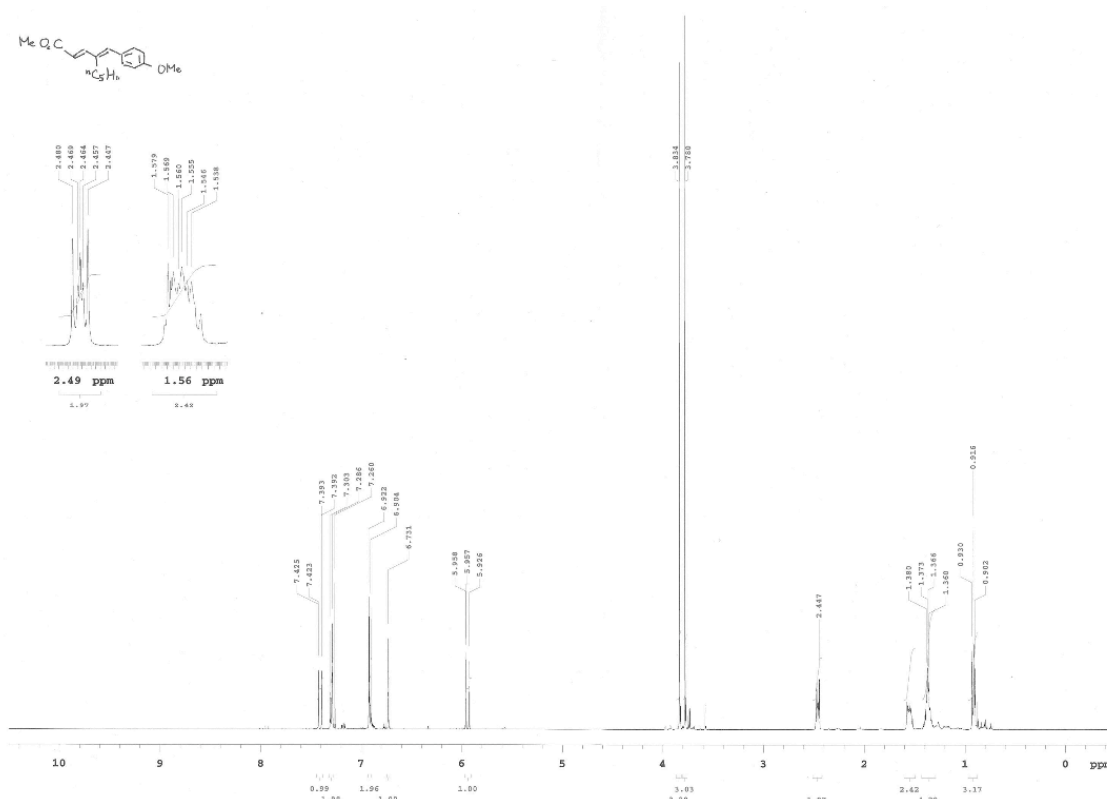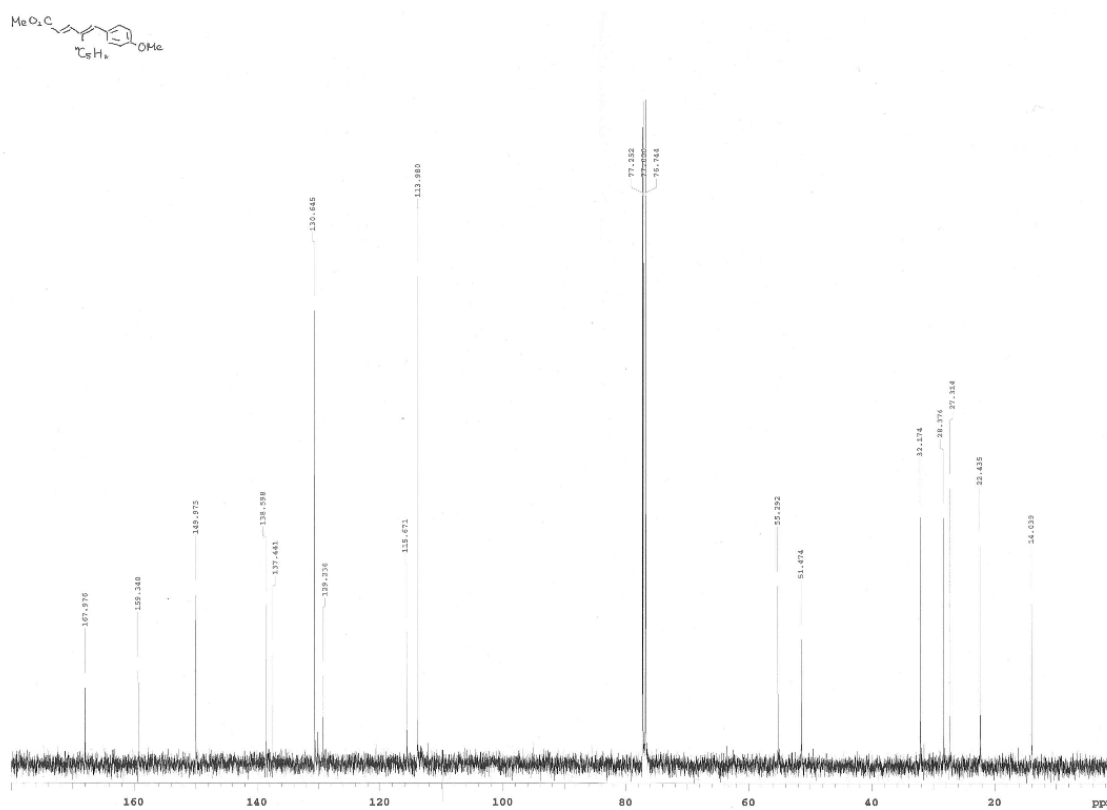

4ah

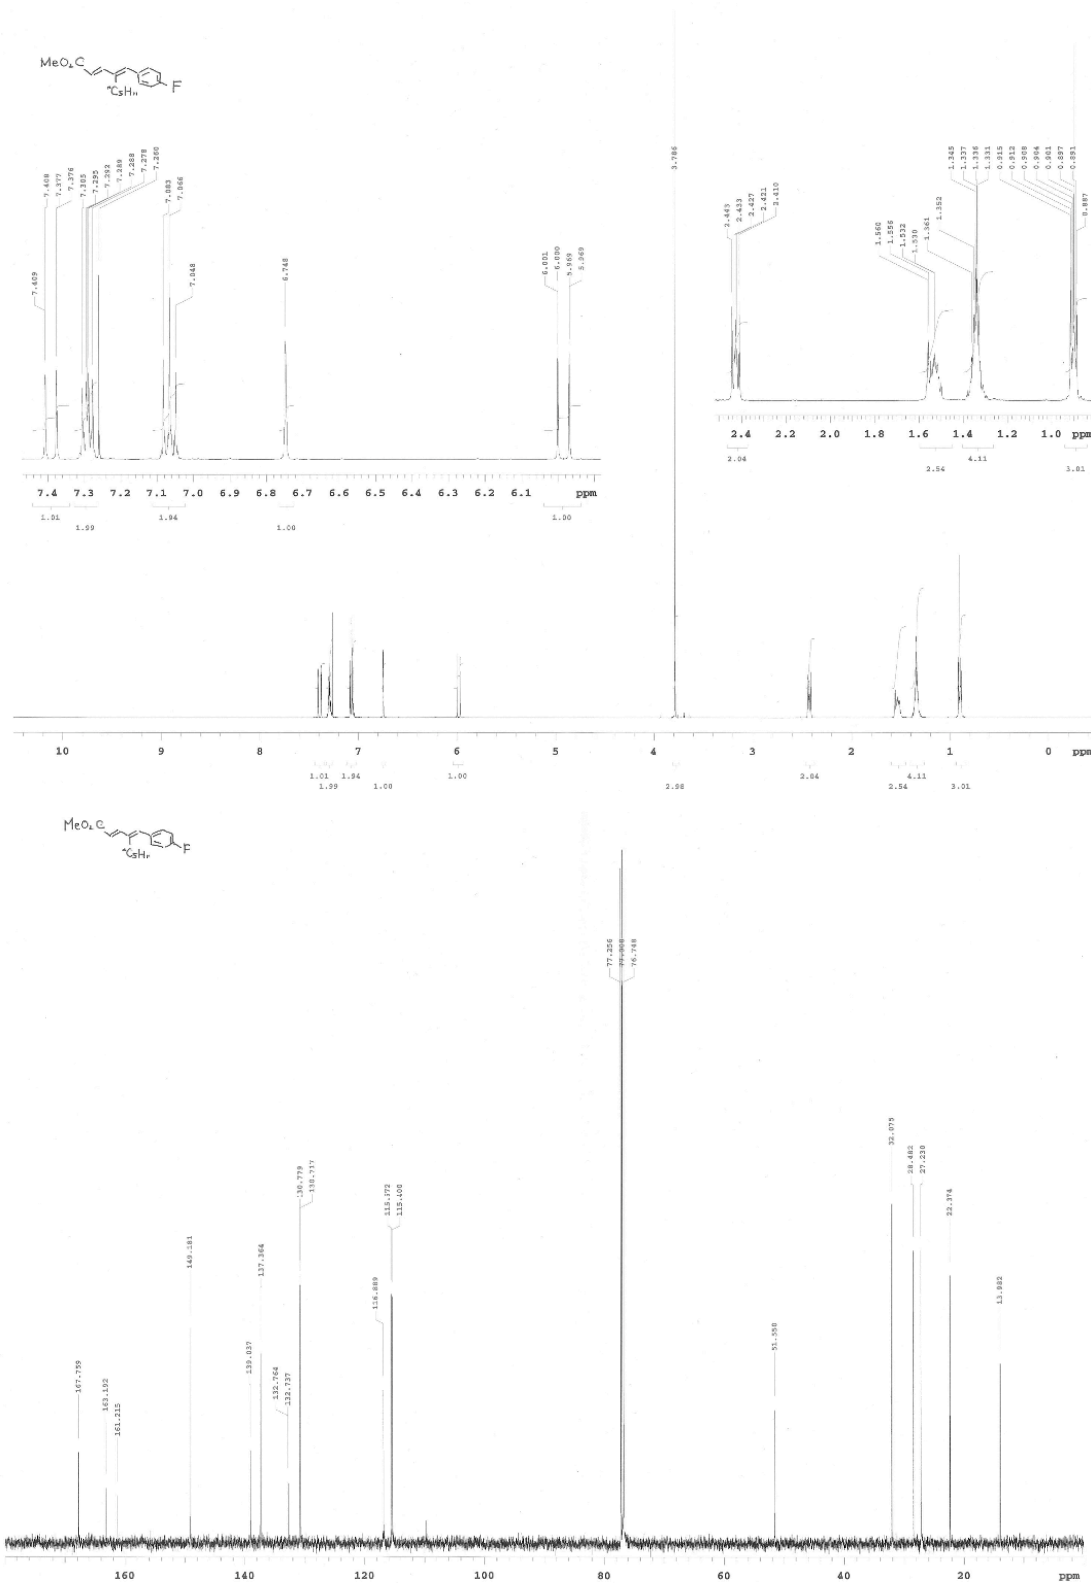

4ai

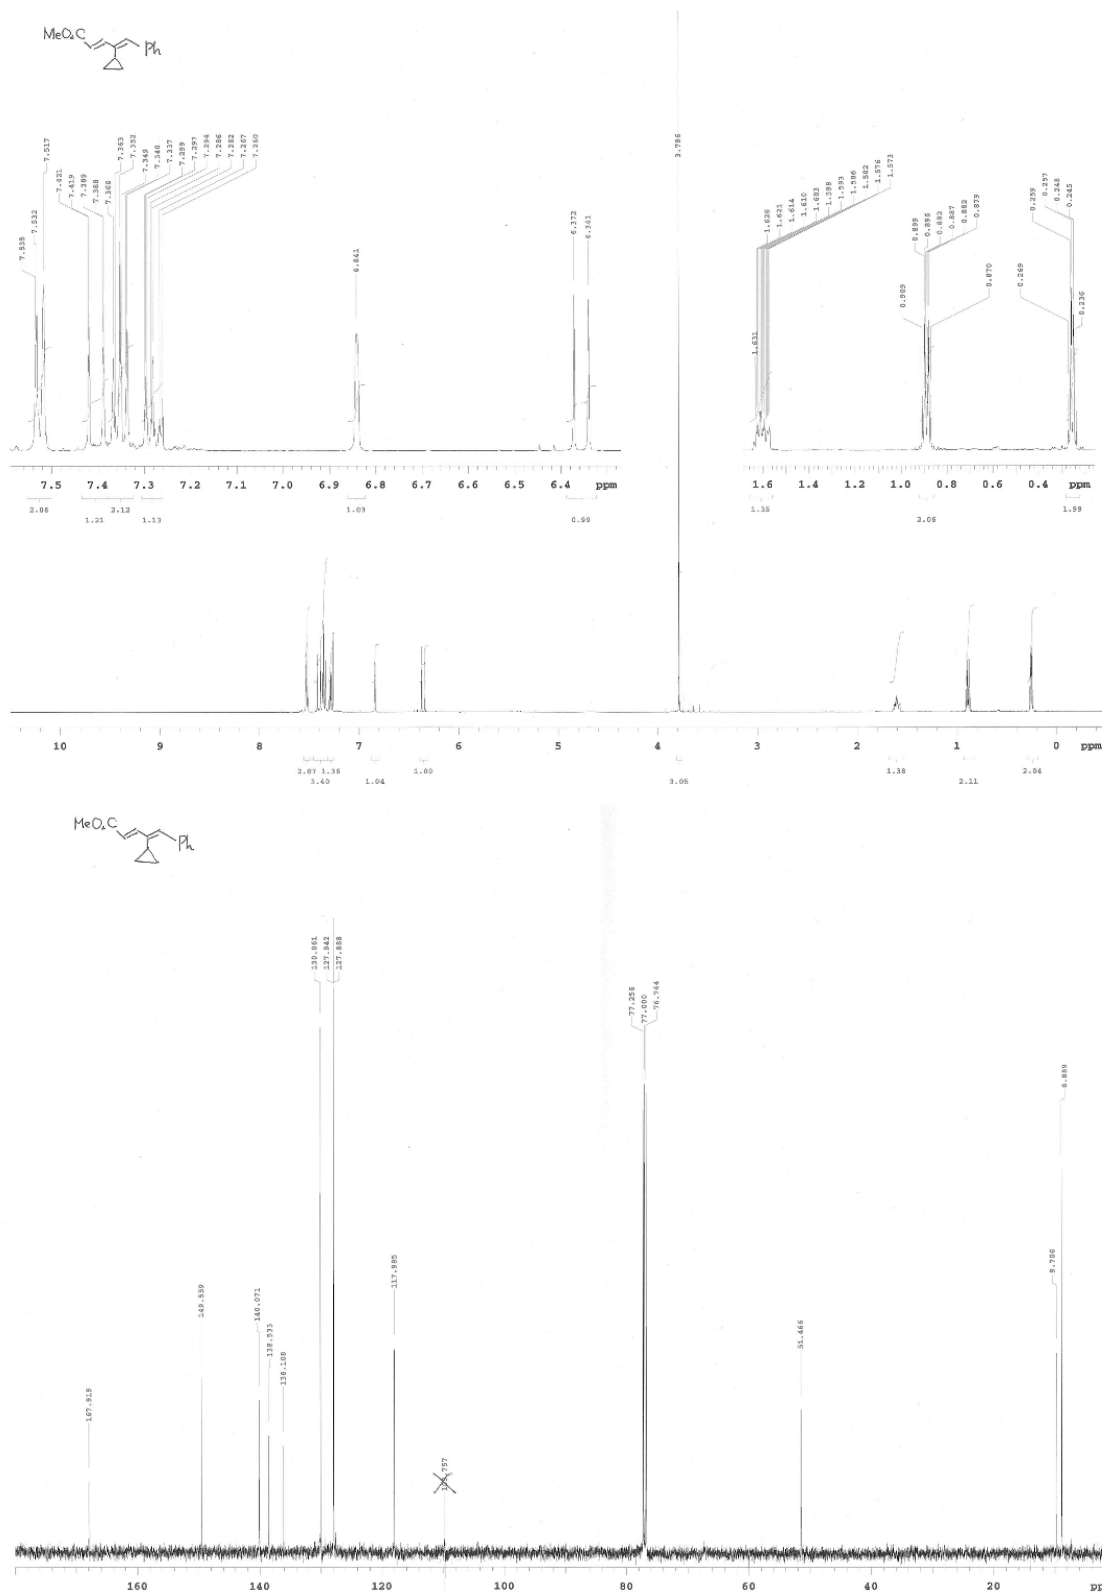





8ba

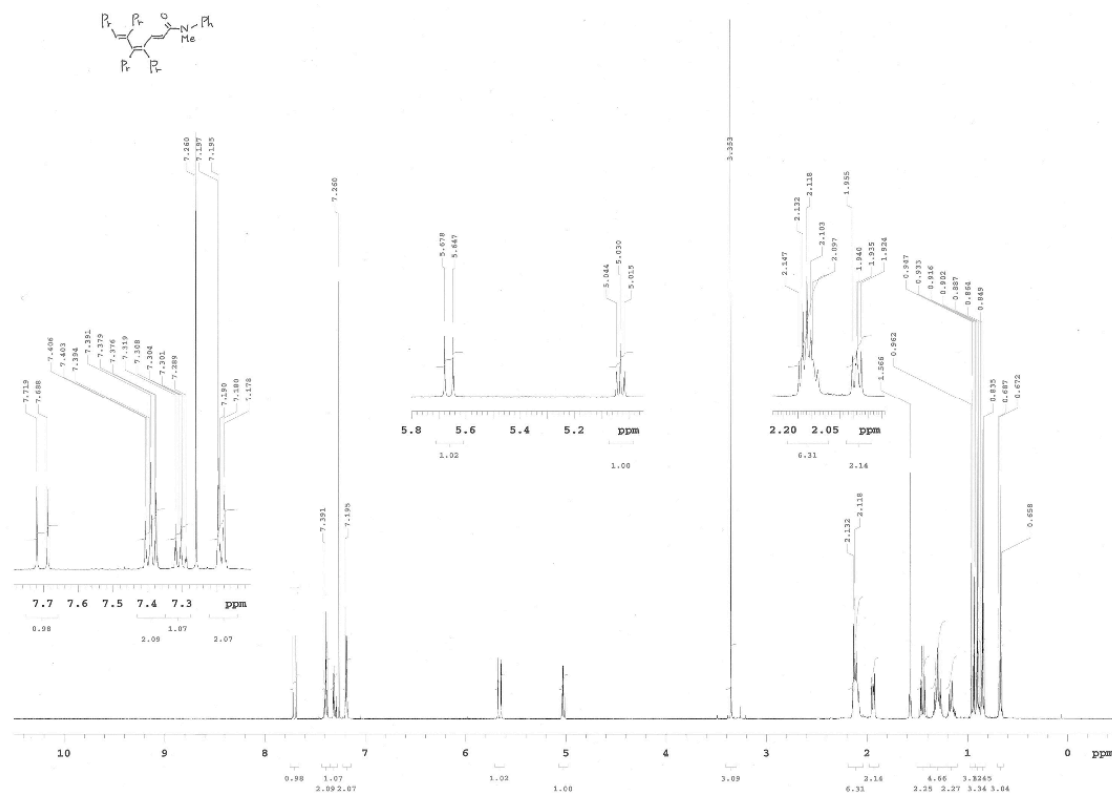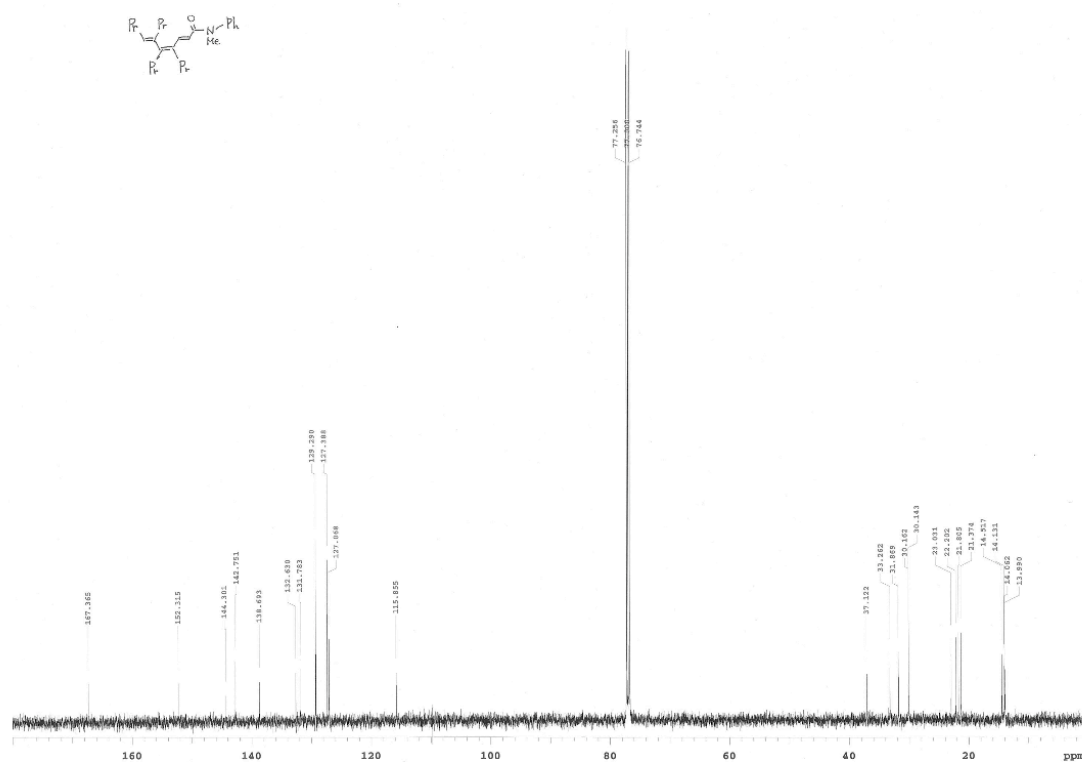

# ORTEP Drawing of A'

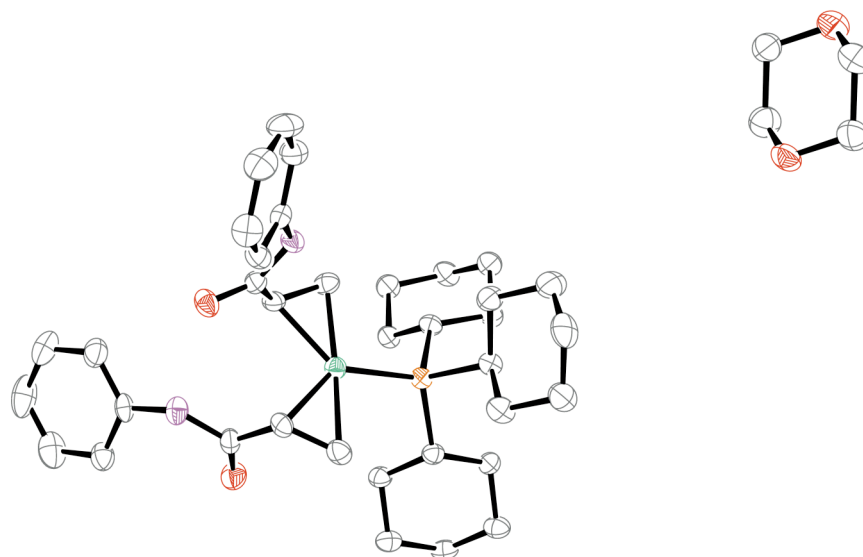

|                      |                                                                                                                                                                                                                     |
|----------------------|---------------------------------------------------------------------------------------------------------------------------------------------------------------------------------------------------------------------|
| Empirical Formula    | C <sub>40</sub> N <sub>2</sub> NiPH <sub>59</sub> O <sub>4</sub>                                                                                                                                                    |
| Formula Weight       | 721.59                                                                                                                                                                                                              |
| Crystal Color, Habit | colorless, prism                                                                                                                                                                                                    |
| Crystal Dimensions   | 0.20 X 0.20 X 0.20 mm                                                                                                                                                                                               |
| Crystal System       | triclinic                                                                                                                                                                                                           |
| Lattice Type         | Primitive                                                                                                                                                                                                           |
| Detector Position    | 49.95 mm                                                                                                                                                                                                            |
| Pixel Size           | 0.068 mm                                                                                                                                                                                                            |
| Lattice Parameters   | $a = 9.847(3) \text{ \AA}$<br>$b = 10.050(3) \text{ \AA}$<br>$c = 19.516(6) \text{ \AA}$<br>$\alpha = 96.441(5)^\circ$<br>$\beta = 99.758(7)^\circ$<br>$\gamma = 94.550(3)^\circ$<br>$V = 1881.8(11) \text{ \AA}^3$ |
| Space Group          | P-1 (#2)                                                                                                                                                                                                            |
| Z value              | 2                                                                                                                                                                                                                   |
| D <sub>calc</sub>    | 1.273 g/cm <sup>3</sup>                                                                                                                                                                                             |
| F <sub>000</sub>     | 776.00                                                                                                                                                                                                              |
| m(MoKa)              | 6.001 cm <sup>-1</sup>                                                                                                                                                                                              |
| Detector             | Rigaku Saturn                                                                                                                                                                                                       |
| Goniometer           | Rigaku AFC10                                                                                                                                                                                                        |
| Radiation            | MoKa ( $\lambda = 0.71070 \text{ \AA}$ )                                                                                                                                                                            |

|                                             |                                                                       |
|---------------------------------------------|-----------------------------------------------------------------------|
|                                             | graphite monochromated                                                |
| Detector Aperture                           | 70 mm x 70 mm                                                         |
| Data Images                                 | 720 exposures                                                         |
| $\omega$ oscillation Range (c=45.0, f=0.0)  | -110.0 - 70.0°                                                        |
| Exposure Rate                               | 80.0 sec./°                                                           |
| Detector Swing Angle                        | -19.93°                                                               |
| $\omega$ oscillation Range (c=45.0, f=90.0) | -110.0 - 70.0°                                                        |
| Exposure Rate                               | 80.0 sec./°                                                           |
| Detector Swing Angle                        | -19.93°                                                               |
| Detector Position                           | 49.95 mm                                                              |
| Pixel Size                                  | 0.068 mm                                                              |
| 2 $\theta_{\max}$                           | 54.9°                                                                 |
| No. of Reflections Measured                 | Total: 14217<br>Unique: 8099 ( $R_{\text{int}} = 0.063$ )             |
| Corrections                                 | Lorentz-polarization<br>Absorption<br>(trans. factors: 0.761 - 0.887) |
| Structure Solution                          | Direct Methods (SIR92)                                                |
| Refinement                                  | Full-matrix least-squares on $F^2$                                    |
| Function Minimized                          | $\sum w (F_o^2 - F_c^2)^2$                                            |
| Least Squares Weights                       | $1/[0.8500s(F_o^2)]/(4F_o^2)$                                         |
| 2 $\theta_{\max}$ cutoff                    | 54.9°                                                                 |
| Anomalous Dispersion                        | All non-hydrogen atoms                                                |
| No. Observations (All reflections)          | 8099                                                                  |
| No. Variables                               | 492                                                                   |
| Reflection/Parameter Ratio                  | 16.46                                                                 |
| Residuals: $R_1$ ( $I > 2.00s(I)$ )         | 0.0644                                                                |
| Residuals: $R$ (All reflections)            | 0.1184                                                                |
| Residuals: $wR_2$ (All reflections)         | 0.1037                                                                |
| Goodness of Fit Indicator                   | 1.024                                                                 |
| Max Shift/Error in Final Cycle              | 0.000                                                                 |
| Maximum peak in Final Diff. Map             | 1.03 e/Å <sup>3</sup>                                                 |
| Minimum peak in Final Diff. Map             | -0.85 e/Å <sup>3</sup>                                                |
